# Supplementary material
Source: PubMed Central journal article supplement (PMC7177629)
Supplement: jama-323-2052-s001.pdf [file jama-323-2052-s001.pdf]

## Supplementary Online Content

Richardson S, Hirsch JS, Narasimhan M, Crawford JM, McGinn T, Davidson KW; the Northwell COVID-19 Research Consortium. Presenting characteristics, comorbidities, and outcomes among 5700 patients hospitalized with COVID-19 in the New York City area. *JAMA*. doi:10.1001/jama.2020.6775

**eTable 1.** Clinical Measures and Outcomes for Patients Discharged Alive or Dead at Study End Point – By Comorbidity

**eTable 2.** Clinical Measures and Outcomes for Patients Discharged Alive or Dead at Study End Point – By Home Medication

This supplementary material has been provided by the authors to give readers additional information about their work.

**eTable 1. Clinical Measures and Outcomes for Patients Discharged Alive or Dead at Study End Point – By Comorbidity**

| Clinical Course Measures                                                                | Discharged Non-diabetic<br>N=1548 | Discharged Diabetic<br>N=533 | Died Non-diabetic<br>N=329 | Died Diabetic<br>N=224   | Discharged Non-HTN<br>N=1099 | Discharged HTN<br>N=982  | Died Non-HTN<br>N=169    | Died HTN<br>N=384        |
|-----------------------------------------------------------------------------------------|-----------------------------------|------------------------------|----------------------------|--------------------------|------------------------------|--------------------------|--------------------------|--------------------------|
| Invasive Mechanical Ventilation                                                         | 29 (1.9%)                         | 9 (1.7%)                     | 157 (47.7%)                | 125 (55.8%)              | 19 (1.7%)                    | 19 (1.9%)                | 100 (59.2%)              | 182 (47.4%)              |
| ICU Care                                                                                | 61 (3.9%)                         | 21 (3.9%)                    | 162 (49.2%)                | 129 (57.6%)              | 43 (3.9%)                    | 39 (4.0%)                | 102 (60.3%)              | 189 (49.2%)              |
| Absolute Lymphocyte Count at Nadir, median (IQR), K/ $\mu$ L, (reference range 1.0-3.3) | 0.9 (0.6 – 1.2)<br>N=1542         | 0.9 (0.6 – 1.2)<br>N=533     | 0.5 (0.3 – 0.8)<br>N=327   | 0.5 (0.3 – 0.8)<br>N=224 | 0.9 (0.6 – 1.2)<br>N=1093    | 0.9 (0.6 – 1.2)<br>N=982 | 0.6 (0.3 – 0.8)<br>N=169 | 0.5 (0.3 – 0.8)<br>N=382 |
| Acute Kidney Injury <sup>a</sup>                                                        | 112 (8.0%)<br>N=1396              | 64 (13.5%)<br>N=474          | 200 (69.9%)<br>N=286       | 147 (80.3%)<br>N=195     | 56 (5.7%)<br>N=976           | 120 (13.4%)<br>N=894     | 122 (80.3%)<br>N=152     | 225 (68.4%)<br>N=329     |
| Kidney Replacement Therapy                                                              | 2 (0.1%)                          | 1 (0.2%)                     | 38 (12.1%)                 | 40 (19.4%)               | 2 (0.2%)                     | 1 (0.1%)                 | 30 (18.3%)               | 48 (13.8%)               |
| Acute Hepatic Injury <sup>b</sup>                                                       | 1 (0.1%)<br>N=1542                | 2 (0.4%)                     | 28 (8.6%)<br>N=327         | 25 (11.2%)<br>N=224      | 1 (0.1%)<br>N=1093           | 2 (0.2%)<br>N=982        | 27 (16.0%)<br>N=169      | 26 (6.8%)<br>N=382       |
| <b>Outcomes</b>                                                                         |                                   |                              |                            |                          |                              |                          |                          |                          |
| Length of Stay <sup>c</sup> , median (IQR), days                                        | 3.8 (2.1 – 6.6)                   | 4.4 (2.7 – 6.9)              | 4.4 (1.9 – 7.1)            | 5.1 (2.6 – 7.9)          | 3.7 (2.1 – 6.2)              | 4.4 (2.7 – 7.0)          | 4.5 (2.3 – 7.0)          | 4.9 (2.2 – 7.5)          |
| Readmitted <sup>d</sup>                                                                 | 31 (2.0%)                         | 14 (2.6%)                    | N/A                        | N/A                      | 21 (1.9%)                    | 24 (2.4%)                | N/A                      | N/A                      |
| <b>Discharge Disposition of 2,081 Patients Discharged Alive</b>                         |                                   |                              |                            |                          |                              |                          |                          |                          |
| Home                                                                                    | 1468 (94.8%)                      | 491 (92.1%)                  | N/A                        | N/A                      | 1059 (96.4%)                 | 900 (91.6%)              | N/A                      | N/A                      |
| Facilities (i.e. Nursing Home, Rehab)                                                   | 80 (5.2%)                         | 42 (7.9%)                    | N/A                        | N/A                      | 40 (3.6%)                    | 82 (8.4%)                | N/A                      | N/A                      |

SI conversion factors: To convert absolute lymphocyte count to  $\times 10^9/L$ , multiply by 0.001

Abbreviations: HTN, hypertensive

<sup>a</sup>Acute kidney injury was identified as an increase in serum creatinine by  $\geq 0.3$  milligrams per deciliter (mg/dl) ( $\geq 26.5$  moles per liter [lmol/l]) within 48 hours or an increase in serum creatinine to  $\geq 1.5$  times baseline within the prior 7 days compared with the preceding 1 year of data in acute care medical records. Acute kidney injury is calculated only for patients with record of baseline kidney function data available and without a diagnosis of end-stage kidney disease

<sup>b</sup>Acute hepatic injury was defined as an elevation in aspartate aminotransferase (AST) or alanine aminotransferase (ALT) of  $>15$  times the upper limit of normal.

<sup>c</sup>Length of stay begins with admission time and ends with discharge time or time of death. It does not include time in the Emergency Department.

<sup>d</sup>Data are presented here for readmission during the study period, March 1<sup>st</sup> to April 4<sup>th</sup>, 2020

**eTable 2. Clinical Measures and Outcomes for Patients Discharged Alive or Dead at Study End Point – By Home Medication<sup>a</sup>**

| Clinical Course Measures                                                                | Discharged HTN, no ACE or ARB<br>N=699 | Discharged HTN, on ACE<br>N=113 | Discharged HTN, on ARB<br>N=170 | Died HTN, no ACE or ARB<br>N=254 | Died HTN, on ACE<br>N=55 | Died HTN, on ARB<br>N=75 |
|-----------------------------------------------------------------------------------------|----------------------------------------|---------------------------------|---------------------------------|----------------------------------|--------------------------|--------------------------|
| Invasive Mechanical Ventilation                                                         | 14 (2.0%)                              | 1 (0.9%)                        | 4 (2.4%)                        | 108 (42.5%)                      | 32 (58.2%)               | 42 (56.0%)               |
| ICU Care                                                                                | 30 (4.3%)                              | 3 (2.7%)                        | 6 (3.5%)                        | 111 (43.7%)                      | 33 (60.0%)               | 45 (60.0%)               |
| Absolute Lymphocyte Count at Nadir, median (IQR), K/ $\mu$ L, (reference range 1.0-3.3) | 0.9 (0.6 – 1.2)<br>N=699               | 0.8 (0.6 – 1.1)<br>N=113        | 0.9 (0.6 – 1.2)<br>N=170        | 0.5 (0.3 – 0.8)<br>N=253         | 0.4 (0.2 – 0.7)<br>N=54  | 0.5 (0.3 – 0.8)<br>N=75  |
| Acute Kidney Injury <sup>b</sup>                                                        | 96 (15.2%)<br>N=631                    | 6 (5.7%)<br>N=106               | 18 (11.5%)<br>N=157             | 139 (66.5%)<br>N=209             | 36 (69.2%)<br>N=52       | 50 (73.5%)<br>N=68       |
| Kidney Replacement Therapy                                                              | 0 (0%)                                 | 1 (0.9%)                        | 0 (0%)                          | 26 (11.2%)                       | 12 (22.2%)               | 10 (14.1%)               |
| Acute Hepatic Injury <sup>c</sup>                                                       | 2 (0.3%)<br>N=699                      | 0 (0%)<br>N=113                 | 0 (0%)<br>N=170                 | 16 (6.3%)<br>N=253               | 7 (13.0%)<br>N=54        | 3 (4.0%)<br>N=75         |
| <b>Outcomes</b>                                                                         |                                        |                                 |                                 |                                  |                          |                          |
| Length of Stay <sup>d</sup> , median (IQR), days                                        | 4.6 (2.8 – 7.3)                        | 3.7 (2.2 – 6.2)                 | 4.1 (2.4 – 6.5)                 | 4.4 (2.1 – 6.9)                  | 6.5 (3.5 – 9.5)          | 5.0 (2.2 – 7.7)          |
| Readmitted <sup>e</sup>                                                                 | 18 (2.6%)                              | 3 (2.7%)                        | 3 (1.8%)                        | N/A                              | N/A                      | N/A                      |
| <b>Discharge Disposition of 2,081 Patients Discharged Alive</b>                         |                                        |                                 |                                 |                                  |                          |                          |
| Home                                                                                    | 639 (91.4%)                            | 106 (93.8%)                     | 155 (91.2%)                     | N/A                              | N/A                      | N/A                      |
| Facilities (i.e. Nursing Home, Rehab)                                                   | 60 (8.6%)                              | 7 (6.2%)                        | 15 (8.8%)                       | N/A                              | N/A                      | N/A                      |

SI conversion factors: To convert absolute lymphocyte count to  $\times 10^9/L$ , multiply by 0.001

Abbreviations: HTN, hypertensive; ACEi, angiotensin-converting-enzyme inhibitor; ARB, angiotensin II receptor blocker

<sup>a</sup> Home medications reflect those actively entered during admission medication reconciliation by the inpatient admitting physician. Final reconciliation has been delayed until discharge during the current crisis so are presented only for patients who have completed their hospital course to ensure accuracy.

<sup>b</sup> Acute kidney injury was identified as an increase in serum creatinine by  $\geq 0.3$  milligrams per deciliter (mg/dl) ( $\geq 26.5$  moles per liter [lmol/l]) within 48 hours or an increase in serum creatinine to  $\geq 1.5$  times baseline within the prior 7 days compared with the preceding 1 year of data in acute care medical records. Acute kidney injury is calculated only for patients with record of baseline kidney function data available and without a diagnosis of end-stage kidney disease

<sup>c</sup> Acute hepatic injury was defined as an elevation in aspartate aminotransferase (AST) or alanine aminotransferase (ALT) of  $>15$  times the upper limit of normal.

<sup>d</sup> Length of stay begins with admission time and ends with discharge time or time of death. It does not include time in the Emergency Department.

<sup>e</sup> Data are presented here for readmission during the study period, March 1<sup>st</sup> to April 4<sup>th</sup>, 2020.
